# Supplementary material for: Coupling between Catalytic Loop Motions and Enzyme Global Dynamics
Source: PubMed Central journal article supplement (PMC3459879; doi:10.1371/journal.pcbi.1002705), 2012-09-27

**PTP**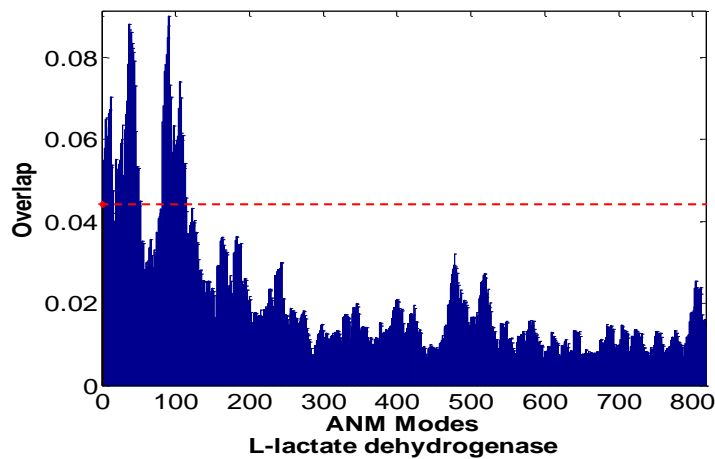**b 1,4-galactosyltransferase**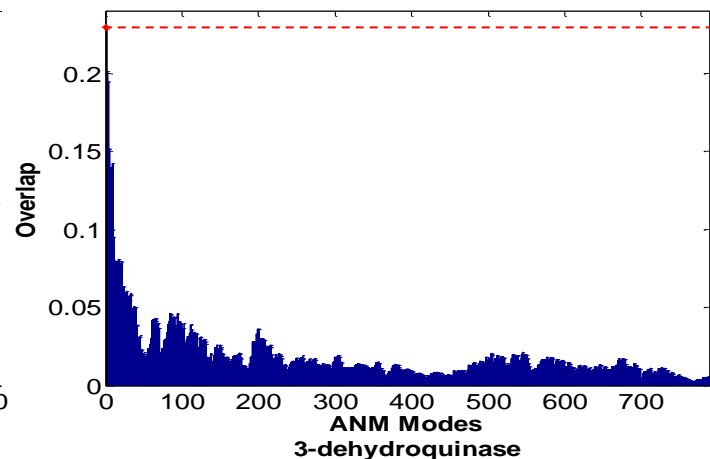**L-lactate dehydrogenase**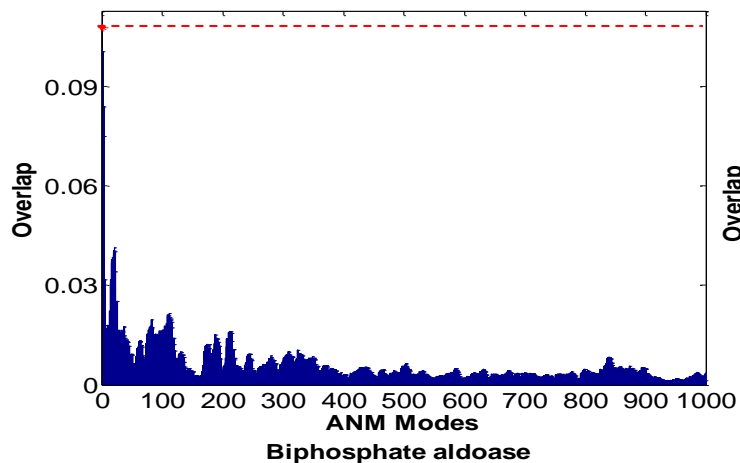**3-dehydroquinase**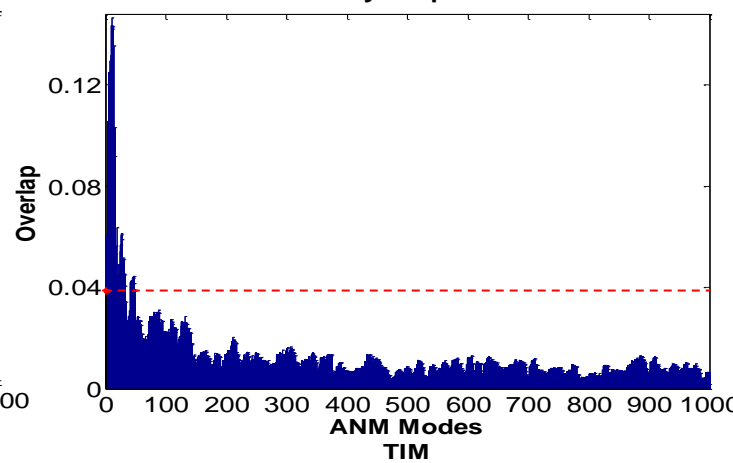**Biphosphate aldose**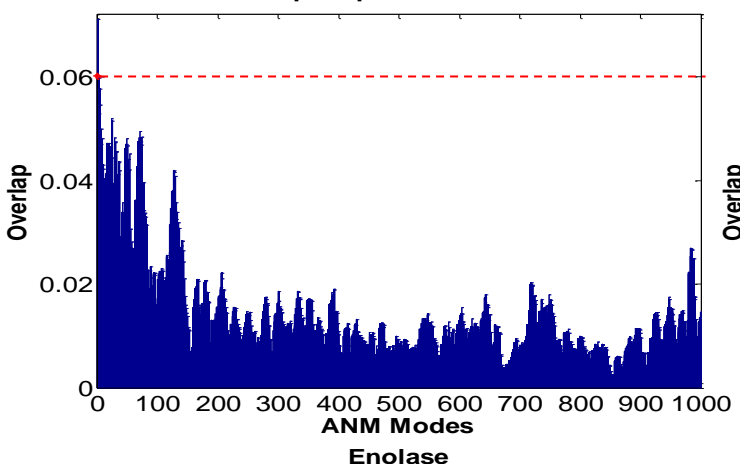**TIM**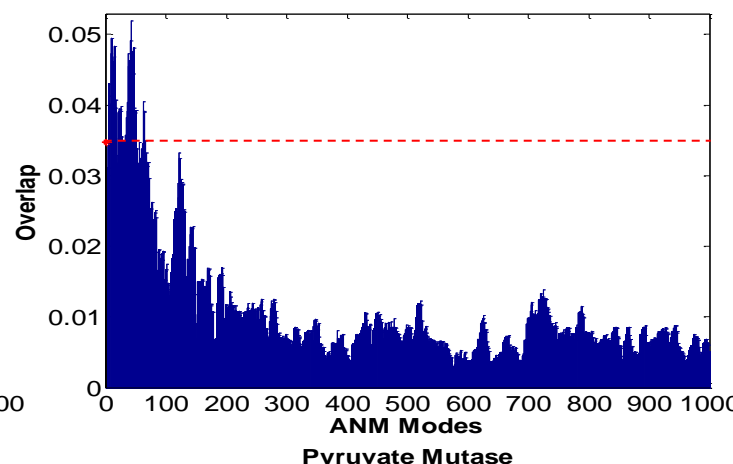**Enolase**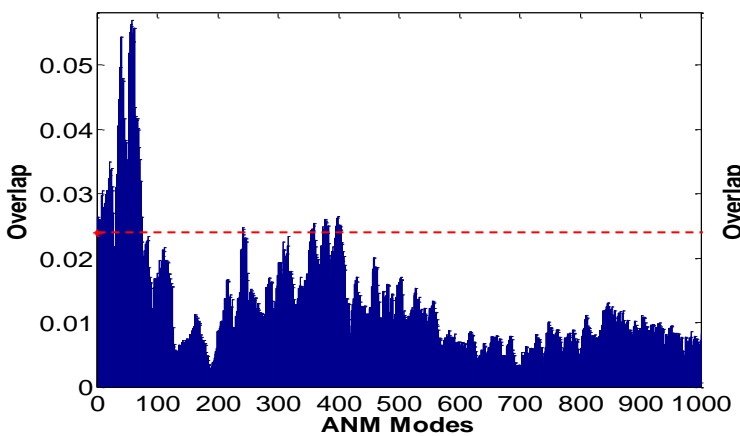**Pyruvate Mutase**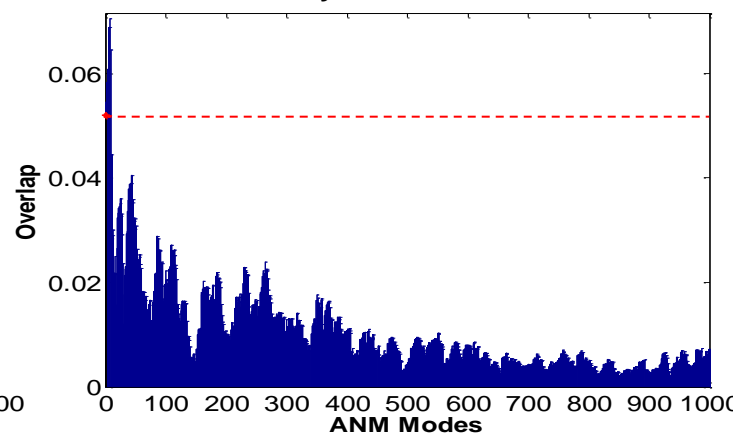

Supplement: pcbi.1002705.s003.pdf [file pcbi.1002705.s003.pdf]
