# Supplementary material for: Coupling between Catalytic Loop Motions and Enzyme Global Dynamics
Source: PubMed Central journal article supplement (PMC3459879; doi:10.1371/journal.pcbi.1002705), 2012-09-27
Supplement: pcbi.1002705.s006.pdf [file pcbi.1002705.s006.pdf]

### ***Iterative procedure for optimal superimposition of ensembles of structures***

The procedure consists of the following steps: (i) First, each structure in the ensemble is pairwise superposed onto a randomly selected reference structure using the Kabsch algorithm [1]. (ii) An average set of coordinates is calculated for the superposed set obtained in (i), referred to as the ‘average model’, (iii) all structures are pairwise superposed on the newly generated ‘average model’ using the Kabsch algorithm, (iv) steps (ii)-(iii) are repeated until the average model generated in two successive iterations changes by less than the threshold RMSD of 0.001Å. The present superposition method ensures that the structures do not undergo rigid body translational and rotational motions, and allow for direct comparison of the deformation vectors with the ANM eigenvectors describe purely internal motions. This method is used both in PCA of structures and EDA of MD trajectories.

### ***MD simulation details for PTP***

System was prepared using PSFGEN, Solvate and AutoIonize plugins of VMD [2]. Solvation box padding distance was set to 6 Å along each direction. Four chloride ions were added to neutralize the system. System was energy minimized for 2000 steps, and equilibrated for 60 ps prior to productive run. Equilibration started at 100 K and the temperature was raised to 300 K in the first 20 ps at increments of 10 K/ps. During equilibration, protein heavy atoms were constrained using harmonic potential with force constant of 0.5 kcal/mol. In equilibration and productive simulation, the cutoff distance was set to 10 Å, all bonds with hydrogen atoms were fixed and integration time step of 2 fs was used.

### ***Calculation of the covariance matrix (from experimental structures, MD snapshots and ANM modes)***

The covariance matrix  $\mathbf{C}$  is a  $3N \times 3N$  matrix for a protein of  $N$  residues (with known coordinates), which may be written in terms of a set of  $N \times N$  submatrices  $\mathbf{C}^{(ij)}$  ( $1 \leq i, j \leq N$ ), each of size  $3 \times 3$

$$\mathbf{C}^{(ij)} = \begin{bmatrix} \langle \Delta x_i \Delta x_j \rangle & \langle \Delta x_i \Delta y_j \rangle & \langle \Delta x_i \Delta z_j \rangle \\ \langle \Delta y_i \Delta x_j \rangle & \langle \Delta y_i \Delta y_j \rangle & \langle \Delta y_i \Delta z_j \rangle \\ \langle \Delta z_i \Delta x_j \rangle & \langle \Delta z_i \Delta y_j \rangle & \langle \Delta z_i \Delta z_j \rangle \end{bmatrix} \quad (2)$$

Here  $\langle \Delta \mathbf{x}_i \Delta \mathbf{y}_j \rangle$  represents the cross correlation between (i) the X-component of the fluctuation vector  $\Delta \mathbf{R}_i^s$  representing the departure of the  $i^{\text{th}}$  residue from its mean position, and (ii) the Y-component of  $\Delta \mathbf{R}_j^s$  representing the departure of the  $j^{\text{th}}$  residue from its mean position, averaged over all structures ( $1 \leq s \leq m$ ) in the examined dataset. The sum of the diagonal elements of  $\mathbf{C}^{(ij)}$  gives the cross-correlations between the fluctuations of residues  $i$  and  $j$  as  $tr\{\mathbf{C}^{(ij)}\} = \langle \Delta \mathbf{R}_i \cdot \Delta \mathbf{R}_j \rangle$ , and the  $i^{\text{th}}$  diagonal block gives the mean-square fluctuations of residue  $i$ , i.e.,  $tr\{\mathbf{C}^{(ii)}\} = \langle (\Delta \mathbf{R}_i)^2 \rangle$ .

**Table. S1.** PDB structure datasets of the enzymes.

| Enzyme                            | PDB codes       |                 |                 |                 |                 |                 |                 |
|-----------------------------------|-----------------|-----------------|-----------------|-----------------|-----------------|-----------------|-----------------|
| <i>M.HhaI</i>                     | 10mh            | 1fjx            | 1hmy            | 1m0e            | 1mht            | 1skm            | 2c7o            |
|                                   | 2c7p            | 2c7q            | 2c7r            | <b>2hmy (O)</b> | 2hr1            | 2i9k            | 2uyh            |
|                                   | 2uyc            | 2uz4            | 2z6a            | 2z6q            | 2z6u            | 2zcyj           | 3eeo            |
|                                   | <b>3mht (C)</b> | 4mht            | 5mht            | 6mht            | 7mht            | 8mht            | 9mht            |
| $\beta$ 1,4-Galactosyltransferase | <b>1fgx (O)</b> | 1fr8            | 1nf5            | 1nhe            | <b>1nkh (C)</b> | 1nmm            | 1nqi            |
|                                   | 1nwg            | 1o0r            | 1o23            | 1oqm            | 1pzt            | 1pzy            | 1tvj            |
|                                   | 1tw1            | 1tw5            | 1yro            | 2fyc            | 2fyd            |                 |                 |
| L-lactate dehydrogenase           | <b>3d0o (O)</b> | <b>3d4p (C)</b> |                 |                 |                 |                 |                 |
| OMP decarboxylase                 | 1dqw            | 1dqx            | <b>3gdk (O)</b> | <b>3gdl (C)</b> | 3gdm            | 3gdr            | 3gdt            |
| 3-dehydroquinase                  | <b>1gqn (O)</b> | <b>1l9w (C)</b> |                 |                 |                 |                 |                 |
| Biphosphate aldolase              | <b>3c4u (O)</b> | <b>3c52 (C)</b> |                 |                 |                 |                 |                 |
| TIM                               | 1spq            | 1sq7            | 1ssd            | 1ssg            | 1su5            | 1sw0            | 1sw3            |
|                                   | 1sw7            | 1tpb            | 1tpc            | <b>1tph (C)</b> | 1tpu            | 1tpv            | 1tpw            |
|                                   | <b>8tim (O)</b> |                 |                 |                 |                 |                 |                 |
| PTP                               | 1lyv            | 1pa9            | 1qz0            | 1xxp            | 1xxv            | <b>1ypt (O)</b> | 1ytn            |
|                                   | <b>1yts (C)</b> | 1ytw            | 2i42            | 3blt            | 3blu            | 3bm8            | 3f99            |
|                                   | 3f9a            | 3f9b            |                 |                 |                 |                 |                 |
| Enolase                           | 1ebg            | 1ebh            | 1els            | 1l8p            | 1nel            | 1one            | 1p43            |
|                                   | 1p48            | 2a11            | 2a12            | 2xgz            | 2xh0            | 2xh2            | 2xh4            |
|                                   | 2xh7            | 2one            | <b>3enl (O)</b> | 4enl            | 5enl            | 6enl            | <b>7enl (C)</b> |
| Pyruvate mutase                   | <b>1mlb (C)</b> | 1pym            | <b>1s2t (O)</b> | 1s2u            | 1s2v            |                 |                 |

*Representative open (O) and closed (C) structures used for RMSD and ANM calculations are shown in bold face.*

**Table S2.** Fraction of variance for PCA of overall structure and loop region of enzymes.

|                                   | <b>Overall structure</b> |            |            | <b>Loop region</b> |            |            |
|-----------------------------------|--------------------------|------------|------------|--------------------|------------|------------|
|                                   | <b>PC1</b>               | <b>PC2</b> | <b>PC3</b> | <b>PC1</b>         | <b>PC2</b> | <b>PC3</b> |
| <i>M.HhaI</i>                     | 0.90                     | 0.08       | 0.01       | 0.99               | 0.00       | 0.00       |
| $\beta$ 1,4-Galactosyltransferase | 0.90                     | 0.06       | 0.01       | 0.95               | 0.04       | 0.01       |
| OMP decarboxylase                 | 0.71                     | 0.26       | 0.03       | 0.87               | 0.12       | 0.01       |
| TIM                               | 0.52                     | 0.24       | 0.11       | 0.85               | 0.07       | 0.03       |
| PTP                               | 0.53                     | 0.15       | 0.09       | 0.94               | 0.02       | 0.02       |
| Enolase                           | 0.64                     | 0.10       | 0.07       | 0.94               | 0.02       | 0.01       |
| Pyruvate mutase                   | 0.99                     | 0.02       | 0.01       | 1.00               | 0.00       | 0.00       |

## Reference List

1. Kabsch W (1976) A solution for the best rotation to relate two sets of vectors. *Acta Crystallographica Section A* 32: 922-923.
2. Humphrey W, Dalke A, Schulten K (1996) VMD: visual molecular dynamics. *J Mol Graph* 14: 33-38.
